# Supplementary material
Source: Elsevier journal article supplement (https://www.sciencedirect.com/science/article/pii/S0025775314003765)
Supplement: mmc1 [file S0025775314003765:mmc1.pdf]

## ANEXOS

### Anexo I: Cuestionario

#### ESTUDIO SOBRE LA PREVALENCIA Y PERCEPCIÓN DEL FRAUDE CIENTÍFICO EN ESPAÑA

1. ¿Cree que las Instrucciones para Autores que publica su revista son lo suficientemente efectivas para contribuir a evitar un posible fraude científico?

NO ☐

SÍ ☐

2. ¿Cuáles son los requisitos que su revista incluye en las Instrucciones para Autores con el objetivo específico de disuadir de un posible fraude científico? Marque todas las opciones que considere.

☐ Publicar los detalles de la contribución de cada firmante a la investigación y al artículo final.

☐ Requisitos de criterio de autoría.

☐ Definiciones de publicación redundante, plagio, conflicto de intereses.

☐ Otras. Detallar .....

.....

.....

3. ¿Qué criterios utiliza su revista para detectar un posible fraude científico? Marque todas las opciones que considere.

☐ Confiar en la honestidad de los autores.

☐ Realizar sistemáticamente una revisión bibliográfica de la literatura.

☐ Realizar sistemáticamente una revisión por panel de expertos.

☐ Solicitar una declaración de originalidad firmada por el autor.

☐ Solicitar, según proceda, los datos originales desglosados o los cuadernos de laboratorio.

☐ Solicitar una declaración de conflicto de intereses firmada antes de la publicación por el autor/es.

4. Una vez que su editorial es consciente de un fraude, ¿se toman medidas?

NO ☐

SÍ ☐

5. Si ha respondido afirmativamente a la pregunta anterior, ¿cuáles son esas medidas? Marque todas las opciones que considere.

- ☐ Escribir al autor/es explicando la postura de la revista y el comportamiento esperado en el futuro
- ☐ Rechazar la publicación del artículo
- ☐ Compartir la información con otras editoriales
- ☐ Publicar una nota sobre el intento de fraude
- ☐ Incluir nota aclaratoria en el siguiente número
- ☐ Publicar una retractación
- ☐ Retirar el artículo
- ☐ Inhabilitar temporalmente al autor/es para publicar en su revista
- ☐ Comunicar el evento a la/s institución/es en las que los autores trabajan
- ☐ Otras. Detallar .....
- .....
- .....
- .....

6. Señale el número aproximado de fraudes científicos que han sido detectados por los revisores previamente a su publicación en los últimos cinco años.

|            | Detectado por revisores |
|------------|-------------------------|
| Nº fraudes |                         |

7. Señale el número aproximado de fraudes científicos que han sido detectados tras la publicación en su revista, así como quién los detectó.

|            | Detectado por revisores | Detectado por lectores | Detectado por autores | Total |
|------------|-------------------------|------------------------|-----------------------|-------|
| Nº fraudes |                         |                        |                       |       |

8. Con los datos que cuenta, ¿cuáles son los tres fraudes más frecuentes detectados en su revista? Marque 1, 2 ó 3, siendo 1 el más frecuente y 3 el menos frecuente.

- ☐ Falsificación de datos o pruebas
- ☐ Datos inventados
- ☐ Plagio

- ☐ Publicación duplicada, redundante o autoplagio
- ☐ Publicación fragmentada ("*salami publication*")
- ☐ Publicación inflada
- ☐ Citas bibliográficas incorrectas
- ☐ Otras. Detallar .....
- .....
- .....
- .....

9. ¿Cree que sería beneficioso la creación de un registro de autores que hayan incurrido en fraude científico, compartido por editores e instituciones científicas?

NO ☐                      Sí ☐

10. ¿Cómo cree que afectaría a la imagen de su revista hacer públicos los fraudes científicos ya publicados?

De forma positiva ☐                      De forma negativa ☐

11. Cuando un autor solicita cambios en la autoría de una publicación científica, ¿qué hace su editorial?

- ☐ Confía en la honestidad del autor que solicita el cambio
- ☐ Contacta con el resto de autores
- ☐ Otras. Detallar .....
- .....
- .....
- .....

12. ¿Publica artículos que no hayan pasado la revisión por pares?

- ☐ Nunca
- ☐ Esporádicamente
- ☐ Frecuentemente

13. ¿Cuál cree que es la tendencia de intento de fraude científico?

- ☐ Creciente
- ☐ Estable
- ☐ Decreciente

14. ¿Cree que el número de fraudes científicos que se publican y se detectan es preocupante para el ámbito científico de su revista?

NO ☐      Sí ☐

15. ¿Cree que hacer público en su revista que se ha publicado un fraude científico disuadirá a los demás autores de intentarlo?

NO ☐      Sí ☐

16. ¿Cree que en un futuro en su revista se endurecerán las medidas antifraude?

NO ☐      Sí ☐

17. ¿Cree que en el conjunto de las revistas españolas se endurecerán las medidas antifraude?

NO ☐      Sí ☐

18. ¿El grupo evaluador de su revista recibe información sobre fuentes de financiación y son conscientes de los posibles conflictos de intereses?

NO ☐      Sí ☐

19. ¿Piensa que su revista está suficientemente preparada para detectar y evitar un posible fraude científico?

NO ☐      Sí ☐

**Anexo II: Revistas incluidas en el estudio y su factor de impacto**

| REVISTA                                                              | JCR (2010) | SJR (2011) |
|----------------------------------------------------------------------|------------|------------|
| ACTA OTORRINOLARINGOLÓGICA                                           |            | 0,032      |
| ACTA PEDIÁTRICA ESPAÑOLA                                             |            | 0,027      |
| ACTAS DE LA FUNDACIÓN PUIGVERT                                       |            |            |
| ADICCIONES                                                           | 1,127      | 0,041      |
| ANALES DEL INSTITUTO BARRAQUER                                       |            |            |
| ANALES DEL SISTEMA SANITARIO DE NAVARRA. SUPLEMENTOS.                |            | 0,038      |
| ARCHIVOS DE PREVENCIÓN DE RIESGOS LABORALES                          |            |            |
| ARCHIVOS DE PSIQUIATRÍA                                              |            | 0,025      |
| ATENCIÓN FARMACÉUTICA                                                | 0,034      | 0,026      |
| AVANCES EN DIABETOLOGÍA                                              |            |            |
| AVANCES EN PERIODONCIA E IMPLANTOLOGÍA ORAL                          |            |            |
| BOLETÍN DE PEDIATRÍA                                                 |            |            |
| CIENCIA FORENSE                                                      |            |            |
| CIRUGÍA PLÁSTICA IBERO-LATINOAMERICANA                               |            | 0,028      |
| DIÁLISIS Y TRASPLANTE                                                |            | 0,025      |
| EDUCACIÓN MÉDICA                                                     |            | 0,028      |
| EMERGENCIAS                                                          | 3,085      | 0,03       |
| EVIDENCIAS EN PEDIATRÍA                                              |            |            |
| FISIOTERAPIA                                                         |            | 0,028      |
| GACETA MÉDICA DE BILBAO                                              |            |            |
| HIPERTENSIÓN                                                         |            |            |
| INDEX DE ENFERMERÍA                                                  |            | 0,025      |
| INFORMACIÓN TERAPÉUTICA DEL SISTEMA NACIONAL DE SALUD                |            |            |
| INFORMACIONES PSIQUIÁTRICAS                                          |            |            |
| INTERNATIONAL JOURNAL OF DEVELOPMENTAL BIOLOGY                       | 2,856      | 0,446      |
| JOURNAL OF PHYSIOLOGY AND BIOCHEMISTRY                               | 1,357      |            |
| LAW AND THE HUMAN GENOME REVIEW = REVISTA DE DERECHO Y GENOMA HUMANO |            | 0,026      |
| MATRONAS PROFESIÓN                                                   |            | 0,026      |
| MEDICINA CUTÁNEA IBERO-LATINO-AMERICANA                              |            | 0,027      |
| MEDICINA DE FAMILIA. ANDALUCÍA                                       |            |            |
| MEDICINA DE FAMILIA-SEMERGEN                                         |            |            |
| MEDICINA E HISTORIA                                                  |            | 0,026      |
| MEDICINA INTENSIVA                                                   | 1,496      | 0,04       |
| MEDICINA NATURISTA                                                   |            |            |
| MEDICINA ORAL, PATOLOGÍA ORAL Y CIRUGÍA BUCAL                        |            | 0,068      |

|                                                         |       |       |
|---------------------------------------------------------|-------|-------|
| MEDICINA PALIATIVA                                      |       | 0,025 |
| MEDICINA Y SEGURIDAD DEL TRABAJO                        |       |       |
| METAS DE ENFERMERÍA                                     |       |       |
| NEUROCIRUGÍA                                            | 0,366 | 0,044 |
| NORTE DE SALUD MENTAL                                   |       |       |
| ODONTOLOGÍA PEDIÁTRICA                                  |       |       |
| ORIS                                                    |       |       |
| ORL ARAGÓN                                              |       |       |
| PEDIATRÍA RURAL Y EXTRAHOSPITALARIA                     |       |       |
| PHARMACY PRACTICE                                       |       | 0,038 |
| PREVENCIÓN DEL TABAQUISMO                               |       |       |
| PROGRESOS DE OBSTETRICIA Y GINECOLOGÍA                  | 0,028 | 0,251 |
| PROGRESOS EN DIAGNÓSTICO Y TRATAMIENTO PRENATAL         |       |       |
| PSICOTHEMA                                              |       | 0,04  |
| RADIOLOGÍA                                              |       | 0,035 |
| REHABILITACIÓN                                          |       | 0,027 |
| REUMATOLOGÍA CLÍNICA                                    |       | 0,028 |
| REVISTA CLÍNICA DE MEDICINA DE FAMILIA                  |       |       |
| REVISTA CLÍNICA ESPAÑOLA                                | 0,762 | 0,04  |
| REVISTA DE LA ASOCIACIÓN ESPAÑOLA DE NEUROPSQUIATRÍA    |       |       |
| REVISTA DE LA O.F.I.L.                                  |       |       |
| REVISTA DE MEDICINA DE LA UNIVERSIDAD DE NAVARRA        |       | 0,033 |
| REVISTA DE PSIQUIATRÍA INFANTO JUVENIL                  |       |       |
| REVISTA DEL LABORATORIO CLÍNICO                         |       | 0,026 |
| REVISTA ESPAÑOLA DE ANESTESIOLOGÍA Y REANIMACIÓN        |       | 0,033 |
| REVISTA ESPAÑOLA DE CARDIOLOGÍA                         | 2,157 | 0,101 |
| REVISTA ESPAÑOLA DE CIRUGÍA ORAL Y MAXILOFACIAL         |       | 0,027 |
| REVISTA ESPAÑOLA DE DROGODEPENDENCIAS                   |       |       |
| REVISTA ESPAÑOLA DE ENFERMEDADES DIGESTIVAS             | 1,13  | 0,056 |
| REVISTA ESPAÑOLA DE GERIATRÍA Y GERONTOLOGÍA            |       | 0,033 |
| REVISTA ESPAÑOLA DE INVESTIGACIONES QUIRÚRGICAS         |       |       |
| REVISTA ESPAÑOLA DE MEDICINA NUCLEAR                    | 0,77  | 0,042 |
| REVISTA ESPAÑOLA DE PATOLOGÍA                           |       |       |
| REVISTA ESPAÑOLA DE PATOLOGÍA TORÁCICA (antes Neumosur) |       |       |
| REVISTA ESPAÑOLA DE PODOLOGÍA                           |       |       |
| REVISTA ESPAÑOLA DE QUIMIOTERAPIA                       | 0,667 | 0,049 |
| REVISTA ESPAÑOLA DE SALUD PÚBLICA                       |       | 0,053 |
| REVISTA ESPAÑOLA DE SANIDAD PENITENCIARIA               |       |       |
| REVISTA ESPAÑOLA DE TRASPLANTES                         |       |       |

|                                                                                |       |       |
|--------------------------------------------------------------------------------|-------|-------|
| REVISTA IBEROAMERICANA DE CIRUGÍA DE LA MANO                                   |       |       |
| REVISTA IBEROAMERICANA DE FERTILIDAD Y REPRODUCCIÓN HUMANA                     |       |       |
| REVISTA IBEROAMERICANA DE MICOLOGÍA                                            | 1,074 | 0,093 |
| REVISTA INTERDISCIPLINAR DE INVESTIGACIÓN Y CLÍNICA BIOPSIOSOCIAL EN ONCOLOGÍA |       |       |
| REVISTA PEDIATRÍA DE ATENCIÓN PRIMARIA                                         |       |       |
| SANIDAD MILITAR (antes Medicina Militar)                                       |       |       |
| SD. REVISTA MÉDICA INTERNACIONAL SOBRE EL SÍNDROME DE DOWN                     |       |       |
| TRAUMA FUNDACIÓN MAPFRE                                                        |       |       |
